# Supplementary material for: Upcycling Biodegradable PVA/Starch Film to a Bacterial Biopigment and Biopolymer
Source: MDPI journal article supplement (doi:10.3390/polym13213692), 2021-10-27
Supplement: s1 [file s1]

## Supporting Information

# Upcycling Biodegradable PVA/Starch Film to a Bacterial Biopigment and Biopolymer

Brana Pantelic<sup>1#</sup>, Marijana Ponjavic<sup>2#</sup>, Vukasin Jankovic<sup>1</sup>, Ivana Aleksic<sup>1</sup>, Sanja Stevanovic<sup>2</sup>, James Murray<sup>3</sup>, Margaret Brennan Fournet<sup>3</sup> and Jasmina Nikodinovic-Runic<sup>1\*</sup>

\*Corresponding author:

Tel. +381 11 3976034; E-mail: [jasmina.nikodinovic@imgge.bg.ac.rs](mailto:jasmina.nikodinovic@imgge.bg.ac.rs)

Fax: +381 11 3975808; Vojvode Stepe 444a 11000 Belgrade, Serbia

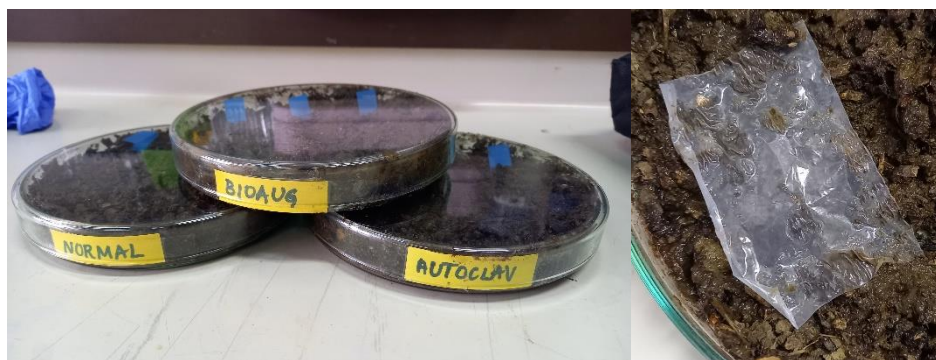

**Figure S1.** Experimental setup of biodegradation under composting conditions: model compost in Petri dishes (left) and PVA/starch film in model compost (right).

Model compost characteristics: pH 7.08;  $\text{CaCO}_3$  – 1.23%, Nitrogen- 0.65%,  $\text{P}_2\text{O}_5$  – 219 mg/100 g;  $\text{K}_2\text{O}$  – 244 mg/100 g

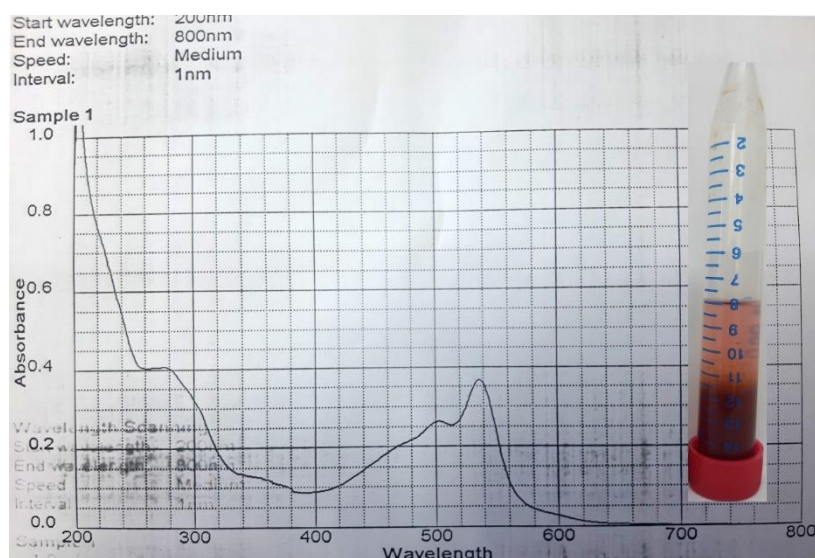

**Figure S2.** UV-Vis spectrum of the extracted undecylprodigiosin from *Streptomyces* sp. JS520 grown in MSM medium containing 10 g/L PVA/TPS substrate and the appearance of the EtOAc culture extract.

**Table S1.** Biomass yield (mg of dry mass/ mL of culture) and conversion rate from bacterial cultures grown in MSM medium with PVA as sole carbon source.

| Strain                            | MSM + PVA 5 g/L |              | MSM + PVA 10 g/L |              |
|-----------------------------------|-----------------|--------------|------------------|--------------|
|                                   | Biomass, mg/ml  | Conversion,% | Biomass, mg/ml   | Conversion,% |
| <i>Ralstonia eutropha</i> H16     | 1.25 ± 0.06     | 25           | 2.75 ± 0.05      | 27           |
| <i>Streptomyces</i> sp. JS520     | 2.65 ± 0.06     | 53           | 7.20 ± 0.04      | 72           |
| <i>Bacillus subtilis</i> ATCC6633 | 3.80 ± 0.04     | 76           | 7.00 ± 0.08      | 70           |

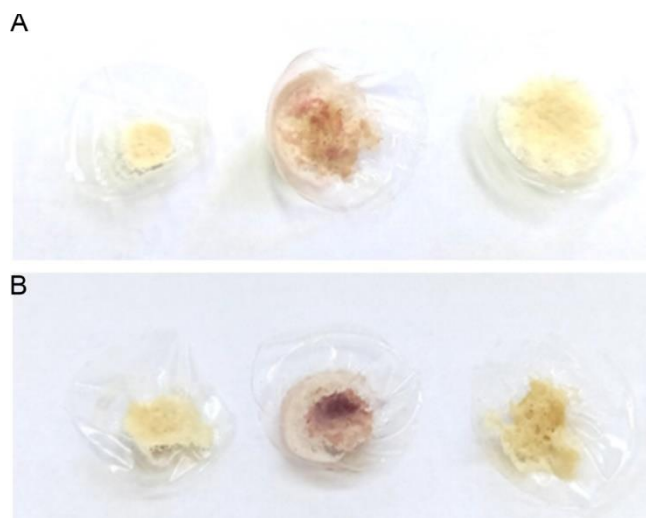

**Figure S3.** Pellets of centrifuged cultures grown in MSM medium with: A) 5 g/L of PVA and B) 10 g/L of PVA. From left to right: *Ralstonia eutropha* H16, *Streptomyces* sp. JS520 and *B. subtilis* ATCC 6633.
